# Supplementary material for: Secondary Succession Altered the Diversity and Co-Occurrence Networks of the Soil Bacterial Communities in Tropical Lowland Rainforests
Source: MDPI journal article supplement (doi:10.3390/plants11101344), 2022-05-19
Supplement: s1 [file s1]

**Table S1. a** The plant Family, Genus, Species and name abbreviations of early successional stage.

|    | Abbreviation | Species name                     | Genus               | Family           |
|----|--------------|----------------------------------|---------------------|------------------|
| 1  | Aatt         | <i>Albizia attopuensis</i>       | <i>Albizia</i>      | Fabaceae         |
| 2  | Adio         | <i>Aporusa dioica</i>            | <i>Aporusa</i>      | Euphorbiaceae    |
| 3  | Agha         | <i>Antidesma ghaesembilla</i>    | <i>Antidesma</i>    | Euphorbiaceae    |
| 4  | Amon         | <i>Antidesma montanum</i>        | <i>Antidesma</i>    | Euphorbiaceae    |
| 5  | Avil         | <i>Aporusa villosa</i>           | <i>Aporusa</i>      | Phyllanthaceae   |
| 6  | Ccoc         | <i>Cratoxylum cochinchinense</i> | <i>Cratoxylum</i>   | Guttiferae       |
| 7  | Cfor         | <i>Crateva formosensis</i>       | <i>Crateva</i>      | Capparaceae      |
| 8  | Chor         | <i>Canthium horridum</i>         | <i>Canthium</i>     | Rubiaceae        |
| 9  | Cjap         | <i>Camellia japonica</i>         | <i>Camellia</i>     | Theaceae         |
| 10 | Cpor         | <i>Cinnamomum porrectum</i>      | <i>Cinnamomum</i>   | Lauraceae        |
| 11 | Dchu         | <i>Diospyros chunii</i>          | <i>Diospyros</i>    | Ebenaceae        |
| 12 | Dgra         | <i>Decaspermum gracilentum</i>   | <i>Decaspermum</i>  | Myrtaceae        |
| 13 | Dtur         | <i>Dillenia turbinata</i>        | <i>Dillenia</i>     | Dilleniaceae     |
| 14 | Fruk         | <i>Flacourtia rukam</i>          | <i>Flacourtia</i>   | Flacourtiaceae   |
| 15 | Gobl         | <i>Garcinia oblongifolia</i>     | <i>Garcinia</i>     | Guttiferae       |
| 16 | Gwri         | <i>Glochidion wrightii</i>       | <i>Glochidion</i>   | Euphorbiaceae    |
| 17 | Hang         | <i>Heritiera angustata</i>       | <i>Heritiera</i>    | Sterculiaceae    |
| 18 | Kbai         | <i>Koilodepas bainanense</i>     | <i>Koilodepas</i>   | Euphorbiaceae    |
| 19 | Mchi         | <i>Machilus chinensis</i>        | <i>Machilus</i>     | Lauraceae        |
| 20 | Mchu         | <i>Microcos chungii</i>          | <i>Microcos</i>     | Tiliaceae        |
| 21 | Mdie         | <i>Millettia dielsiana</i>       | <i>Millettia</i>    | Papilionaceae    |
| 22 | Mlig         | <i>Memecylon ligustrifolium</i>  | <i>Memecylon</i>    | Melastomataceae  |
| 23 | Mpom         | <i>Machilus pomifera</i>         | <i>Machilus</i>     | Lauraceae        |
| 24 | Msan         | <i>Melastoma sanguineum</i>      | <i>Melastoma</i>    | Melastomataceae  |
| 25 | Odio         | <i>Olea dioica</i>               | <i>Olea</i>         | Oleaceae         |
| 26 | Osem         | <i>Ormosia semicastrata</i>      | <i>Ormosia</i>      | Fabaceae         |
| 27 | Pemb         | <i>Phyllanthus emblica</i>       | <i>Phyllanthus</i>  | Euphorbiaceae    |
| 28 | Ppte         | <i>Peltophorum pterocarpum</i>   | <i>Peltophorum</i>  | Fabaceae         |
| 29 | Prub         | <i>Psychotria rubra</i>          | <i>Psychotria</i>   | Rubiaceae        |
| 30 | Rdum         | <i>Rhodamnia dumetorum</i>       | <i>Rhodamnia</i>    | Myrtaceae        |
| 31 | Rfro         | <i>Radermachera frondosa</i>     | <i>Radermachera</i> | Bignoniaceae     |
| 32 | Rtom         | <i>Rhodomyrtus tomentosa</i>     | <i>Rhodomyrtus</i>  | Myrtaceae        |
| 33 | Shai         | <i>Syzygium hainanense</i>       | <i>Syzygium</i>     | Myrtaceae        |
| 34 | Smyr         | <i>Salix myrtillacea</i>         | <i>Salix</i>        | Salicaceae       |
| 35 | Spro         | <i>Saccopetalum prolificum</i>   | <i>Saccopetalum</i> | Annonaceae       |
| 36 | Ssup         | <i>Schima superba</i>            | <i>Schima</i>       | Theaceae         |
| 37 | Step         | <i>Syzygium tephrodes</i>        | <i>Syzygium</i>     | Myrtaceae        |
| 38 | Vman         | <i>Vatica mangachapoi</i>        | <i>Vatica</i>       | Dipterocarpaceae |
| 39 | Vpie         | <i>Vitex pierreana</i>           | <i>Vitex</i>        | Verbenaceae      |
| 40 | Wnut         | <i>Wikstroemia nutans</i>        | <i>Wikstroemia</i>  | Thymelaeaceae    |
| 41 | Wpub         | <i>Wrightia pubescens</i>        | <i>Wrightia</i>     | Apocynaceae      |

|    |      |                                 |                      |              |
|----|------|---------------------------------|----------------------|--------------|
| 42 | Xhai | <i>Xanthophyllum hainanense</i> | <i>Xanthophyllum</i> | Polygalaceae |
| 43 | Zavi | <i>Zanthoxylum avicennae</i>    | <i>Zanthoxylum</i>   | Rutaceae     |

---

**Table S1. b** The plant Family, Genus, Species and name abbreviations of early-mid successional stage.

|    | Abbreviation | Species name                        | Genus                  | Family           |
|----|--------------|-------------------------------------|------------------------|------------------|
| 1  | Aatt         | <i>Albizia attopeuensis</i>         | <i>Albizia</i>         | Fabaceae         |
| 2  | Aden         | <i>Ardisia densilepidotula</i>      | <i>Ardisia</i>         | Myrsinaceae      |
| 3  | Agha         | <i>Antidesma ghaesembilla</i>       | <i>Antidesma</i>       | Euphorbiaceae    |
| 4  | Ahai         | <i>Antidesma hainanense</i>         | <i>Antidesma</i>       | Euphorbiaceae    |
| 5  | Alau         | <i>Albertisia laurifolia</i>        | <i>Albertisia</i>      | Menispermaceae   |
| 6  | Almon        | <i>Alphonsea monogyna</i>           | <i>Alphonsea</i>       | Annonaceae       |
| 7  | Amchi        | <i>Amesiodendron chinense</i>       | <i>Amesiodendron</i>   | Sapindaceae      |
| 8  | Anchi        | <i>Antirhea chinensis</i>           | <i>Antirhea</i>        | Rubiaceae        |
| 9  | Anmon        | <i>Antidesma montanum</i>           | <i>Antidesma</i>       | Euphorbiaceae    |
| 10 | Aoli         | <i>Acronychia oligophlebia</i>      | <i>Acronychia</i>      | Rutaceae         |
| 11 | Atsa         | <i>Amoora tsangii</i>               | <i>Amoora</i>          | Meliaceae        |
| 12 | Avil         | <i>Aporusa villosa</i>              | <i>Aporusa</i>         | Phyllanthaceae   |
| 13 | Bins         | <i>Bridelia insulana</i>            | <i>Bridelia</i>        | Euphorbiaceae    |
| 14 | Blon         | <i>Beilschmiedia longipetiolata</i> | <i>Beilschmiedia</i>   | Lauraceae        |
| 15 | Byun         | <i>Beilschmiedia yunnanensis</i>    | <i>Beilschmiedia</i>   | Lauraceae        |
| 16 | Cafor        | <i>Castanopsis formosana</i>        | <i>Castanopsis</i>     | Fagaceae         |
| 17 | Cbla         | <i>Cyclobalanopsis blakei</i>       | <i>Cyclobalanopsis</i> | Fagaceae         |
| 18 | Cfur         | <i>Camellia furfuracea</i>          | <i>Camellia</i>        | Theaceae         |
| 19 | Chai         | <i>Castanopsis hainanensis</i>      | <i>Castanopsis</i>     | Fagaceae         |
| 20 | Cjuc         | <i>Castanopsis jucunda</i>          | <i>Castanopsis</i>     | Fagaceae         |
| 21 | Clae         | <i>Croton laevigatus</i>            | <i>Croton</i>          | Euphorbiaceae    |
| 22 | Cmet         | <i>Cryptocarya metcalfiana</i>      | <i>Cryptocarya</i>     | Lauraceae        |
| 23 | Cpor         | <i>Cinnamomum porrectum</i>         | <i>Cinnamomum</i>      | Lauraceae        |
| 24 | Crfor        | <i>Crateva formosensis</i>          | <i>Crateva</i>         | Capparaceae      |
| 25 | Dchu         | <i>Diospyros chunii</i>             | <i>Diospyros</i>       | Ebenaceae        |
| 26 | Dhow         | <i>Diospyros howii</i>              | <i>Diospyros</i>       | Ebenaceae        |
| 27 | Dstr         | <i>Diospyros strigosa</i>           | <i>Diospyros</i>       | Ebenaceae        |
| 28 | Dtur         | <i>Dillenia turbinata</i>           | <i>Dillenia</i>        | Dilleniaceae     |
| 29 | Efen         | <i>Engelhardia fenzelii</i>         | <i>Engelhardtia</i>    | Juglandaceae     |
| 30 | Egla         | <i>Ellipanthus glabrifolius</i>     | <i>Ellipanthus</i>     | Connaraceae      |
| 31 | Fcon         | <i>Ficus concinna</i>               | <i>Ficus</i>           | Moraceae         |
| 32 | Fdep         | <i>Fagerlindia depauperata</i>      | <i>Fagerlindia</i>     | Rubiaceae        |
| 33 | Fvar         | <i>Ficus variolosa</i>              | <i>Ficus</i>           | Moraceae         |
| 34 | Gchi         | <i>Goniothalamus chinensis</i>      | <i>Goniothalamus</i>   | Annonaceae       |
| 35 | Gcoc         | <i>Glochidion coccineum</i>         | <i>Glochidion</i>      | Euphorbiaceae    |
| 36 | Glob         | <i>Gonocaryum lobbianum</i>         | <i>Gonocaryum</i>      | Icacinaceae      |
| 37 | Gobl         | <i>Garcinia oblongifolia</i>        | <i>Garcinia</i>        | Guttiferae       |
| 38 | Gwri         | <i>Glochidion wrightii</i>          | <i>Glochidion</i>      | Euphorbiaceae    |
| 39 | Hang         | <i>Heritiera angustata</i>          | <i>Heritiera</i>       | Sterculiaceae    |
| 40 | Hexa         | <i>Hopea exalata</i>                | <i>Hopea</i>           | Dipterocarpaceae |
| 41 | Hpar         | <i>Heritiera parvifolia</i>         | <i>Heritiera</i>       | Sterculiaceae    |

|    |      |                                 |                      |                  |
|----|------|---------------------------------|----------------------|------------------|
| 42 | Hpha | <i>Homalium phanerophlebium</i> | <i>Homalium</i>      | Flacourtiaceae   |
| 43 | Kbai | <i>Koilodepas bainanense</i>    | <i>Koilodepas</i>    | Euphorbiaceae    |
| 44 | Lchi | <i>Litchi chinensis</i>         | <i>Litchi</i>        | Sapindaceae      |
| 45 | Lpha | <i>Laurocerasus phaeosticta</i> | <i>Laurocerasus</i>  | Rosaceae         |
| 46 | Lska | <i>Lithocarpus skanianus</i>    | <i>Lithocarpus</i>   | Fagaceae         |
| 47 | Mcha | <i>Magnolia championii</i>      | <i>Magnolia</i>      | Magnoliaceae     |
| 48 | Mchi | <i>Machilus chinensis</i>       | <i>Machilus</i>      | Lauraceae        |
| 49 | Mchu | <i>Microcos chungii</i>         | <i>Microcos</i>      | Tiliaceae        |
| 50 | Mhoo | <i>Mallotus hookerianus</i>     | <i>Mallotus</i>      | Euphorbiaceae    |
| 51 | Mlig | <i>Memecylon ligustrifolium</i> | <i>Memecylon</i>     | Melastomataceae  |
| 52 | Mpom | <i>Machilus pomifera</i>        | <i>Machilus</i>      | Lauraceae        |
| 53 | Odio | <i>Olea dioica</i>              | <i>Olea</i>          | Oleaceae         |
| 54 | Ppte | <i>Peltophorum pterocarpum</i>  | <i>Peltophorum</i>   | Fabaceae         |
| 55 | Prub | <i>Psychotria rubra</i>         | <i>Psychotria</i>    | Rubiaceae        |
| 56 | Ptav | <i>Phoebe tavoyana</i>          | <i>Phoebe</i>        | Lauraceae        |
| 57 | Ptet | <i>Prismatomeris tetrantra</i>  | <i>Prismatomeris</i> | Rubiaceae        |
| 58 | Rbot | <i>Reevesia botingensis</i>     | <i>Reevesia</i>      | Sterculiaceae    |
| 59 | Rdum | <i>Rhodamnia dumetorum</i>      | <i>Rhodamnia</i>     | Myrtaceae        |
| 60 | Rfro | <i>Radermachera frondosa</i>    | <i>Radermachera</i>  | Bignoniaceae     |
| 61 | Sbra | <i>Syzygium brachythyrsum</i>   | <i>Syzygium</i>      | Myrtaceae        |
| 62 | Sbum | <i>Staphylea bumalda</i>        | <i>Staphylea</i>     | Staphyleaceae    |
| 63 | Schu | <i>Syzygium chunianum</i>       | <i>Syzygium</i>      | Myrtaceae        |
| 64 | Shai | <i>Styrax hainanensis</i>       | <i>Styrax</i>        | Styracaceae      |
| 65 | Slan | <i>Sterculia lanceolata</i>     | <i>Sterculia</i>     | Sterculiaceae    |
| 66 | Slau | <i>Sarcosperma laurinum</i>     | <i>Sarcosperma</i>   | Sapotaceae       |
| 67 | Spoi | <i>Symplocos poilanei</i>       | <i>Symplocos</i>     | Symplocaceae     |
| 68 | Ssae | <i>Scolopia saeva</i>           | <i>Scolopia</i>      | Flacourtiaceae   |
| 69 | Ssup | <i>Schima superba</i>           | <i>Schima</i>        | Theaceae         |
| 70 | Step | <i>Syzygium tephrodes</i>       | <i>Syzygium</i>      | Myrtaceae        |
| 71 | Swal | <i>Scleropyrum wallichianum</i> | <i>Scleropyrum</i>   | Santalaceae      |
| 72 | Tcau | <i>Themeda caudata</i>          | <i>Themeda</i>       | Poaceae          |
| 73 | Twal | <i>Tarennoidea wallichii</i>    | <i>Tarennoidea</i>   | Rubiaceae        |
| 74 | Vman | <i>Vatica mangachapoi</i>       | <i>Vatica</i>        | Dipterocarpaceae |
| 75 | Vpie | <i>Vitex pierreana</i>          | <i>Vitex</i>         | Verbenaceae      |
| 76 | Xhai | <i>Xanthophyllum hainanense</i> | <i>Xanthophyllum</i> | Xanthophyllaceae |

---

**Table S1. c** The plant Family, Genus, Species and name abbreviations of mid successional stage.

|    | Abbreviation | Species name                        | Genus                  | Family           |
|----|--------------|-------------------------------------|------------------------|------------------|
| 1  | Aatt         | <i>Albizia attopeuensis</i>         | <i>Albizia</i>         | Fabaceae         |
| 2  | Aden         | <i>Ardisia densilepidotula</i>      | <i>Ardisia</i>         | Myrsinaceae      |
| 3  | Adio         | <i>Aporusa dioica</i>               | <i>Aporusa</i>         | Euphorbiaceae    |
| 4  | Almon        | <i>Alphonsea monogyna</i>           | <i>Alphonsea</i>       | Annonaceae       |
| 5  | Amchi        | <i>Amesiodendron chinense</i>       | <i>Amesiodendron</i>   | Sapindaceae      |
| 6  | Anchi        | <i>Antirhea chinensis</i>           | <i>Antirhea</i>        | Rubiaceae        |
| 7  | Aner         | <i>Ardisia nervosa</i>              | <i>Ardisia</i>         | Myrsinaceae      |
| 8  | Anmon        | <i>Antidesma montanum</i>           | <i>Antidesma</i>       | Euphorbiaceae    |
| 9  | Aoli         | <i>Acronychia oligophlebia</i>      | <i>Acronychia</i>      | Rutaceae         |
| 10 | Aqui         | <i>Ardisia quinquegona</i>          | <i>Ardisia</i>         | Myrsinaceae      |
| 11 | Asin         | <i>Aquilaria sinensis</i>           | <i>Aquilaria</i>       | Thymelaeaceae    |
| 12 | Atsa         | <i>Amoora tsangii</i>               | <i>Amoora</i>          | Meliaceae        |
| 13 | Blon         | <i>Beilschmiedia longipetiolata</i> | <i>Beilschmiedia</i>   | Lauraceae        |
| 14 | Cafor        | <i>Castanopsis formosana</i>        | <i>Castanopsis</i>     | Fagaceae         |
| 15 | Calb         | <i>Canarium album</i>               | <i>Canarium</i>        | Burseraceae      |
| 16 | Cbla         | <i>Cyclobalanopsis blakei</i>       | <i>Cyclobalanopsis</i> | Fagaceae         |
| 17 | Cbre         | <i>Callicarpa brevipes</i>          | <i>Callicarpa</i>      | Verbenaceae      |
| 18 | Cfur         | <i>Camellia furfuracea</i>          | <i>Camellia</i>        | Theaceae         |
| 19 | Chai         | <i>Castanopsis hainanensis</i>      | <i>Castanopsis</i>     | Fagaceae         |
| 20 | Clae         | <i>Croton laevigatus</i>            | <i>Croton</i>          | Euphorbiaceae    |
| 21 | Cmet         | <i>Cryptocarya metcalfiana</i>      | <i>Cryptocarya</i>     | Lauraceae        |
| 22 | Cole         | <i>Camellia oleifera</i>            | <i>Camellia</i>        | Theaceae         |
| 23 | Cpor         | <i>Cinnamomum porrectum</i>         | <i>Cinnamomum</i>      | Lauraceae        |
| 24 | Crfor        | <i>Crateva formosensis</i>          | <i>Crateva</i>         | Capparaceae      |
| 25 | Dchu         | <i>Diospyros chungii</i>            | <i>Diospyros</i>       | Ebenaceae        |
| 26 | Ddub         | <i>Diplospora dubia</i>             | <i>Diplospora</i>      | Rubiaceae        |
| 27 | Dhai         | <i>Decaspermum hainanense</i>       | <i>Decaspermum</i>     | Myrtaceae        |
| 28 | Dhow         | <i>Diospyros howii</i>              | <i>Diospyros</i>       | Ebenaceae        |
| 29 | Dstr         | <i>Diospyros strigosa</i>           | <i>Diospyros</i>       | Ebenaceae        |
| 30 | Dtur         | <i>Dillenia turbinata</i>           | <i>Dillenia</i>        | Dilleniaceae     |
| 31 | Efen         | <i>Engelhardia fenzelii</i>         | <i>Engelhardtia</i>    | Juglandaceae     |
| 32 | Egla         | <i>Ellipanthus glabrifolius</i>     | <i>Ellipanthus</i>     | Connaraceae      |
| 33 | Fmic         | <i>Ficus microcarpa</i>             | <i>Ficus</i>           | Moraceae         |
| 34 | Fruk         | <i>Flacourtia rukam</i>             | <i>Flacourtia</i>      | Flacourtiaceae   |
| 35 | Fvar         | <i>Ficus variolosa</i>              | <i>Ficus</i>           | Moraceae         |
| 36 | Ggar         | <i>Goniothalamus gardneri</i>       | <i>Goniothalamus</i>   | Annonaceae       |
| 37 | Glob         | <i>Gonocaryum lobbianum</i>         | <i>Gonocaryum</i>      | Icacinaceae      |
| 38 | Gobl         | <i>Garcinia oblongifolia</i>        | <i>Garcinia</i>        | Guttiferae       |
| 39 | Hang         | <i>Heritiera angustata</i>          | <i>Heritiera</i>       | Sterculiaceae    |
| 40 | Hexa         | <i>Hopea exalata</i>                | <i>Hopea</i>           | Dipterocarpaceae |
| 41 | Hpar         | <i>Heritiera parvifolia</i>         | <i>Heritiera</i>       | Sterculiaceae    |
| 42 | Itri         | <i>Ilex triflora</i>                | <i>Ilex</i>            | Aquifoliaceae    |

|    |      |                                  |                      |                  |
|----|------|----------------------------------|----------------------|------------------|
| 43 | Kbai | <i>Koiloceras bairianense</i>    | <i>Koiloceras</i>    | Euphorbiaceae    |
| 44 | Lchi | <i>Litchi chinensis</i>          | <i>Litchi</i>        | Sapindaceae      |
| 45 | Lcom | <i>Lindera communis</i>          | <i>Lindera</i>       | Lauraceae        |
| 46 | Lelo | <i>Litsea elongata</i>           | <i>Litsea</i>        | Lauraceae        |
| 47 | Lpha | <i>Laurocerasus phaeosticta</i>  | <i>Laurocerasus</i>  | Rosaceae         |
| 48 | Lska | <i>Lithocarpus skanianus</i>     | <i>Lithocarpus</i>   | Fagaceae         |
| 49 | Mchi | <i>Machilus chinensis</i>        | <i>Machilus</i>      | Lauraceae        |
| 50 | Mhoo | <i>Mallotus hookerianus</i>      | <i>Mallotus</i>      | Euphorbiaceae    |
| 51 | Mlig | <i>Memecylon ligustrifolium</i>  | <i>Memecylon</i>     | Melastomataceae  |
| 52 | Mpom | <i>Machilus pomifera</i>         | <i>Machilus</i>      | Lauraceae        |
| 53 | Msua | <i>Melodinus suaveolens</i>      | <i>Melodinus</i>     | Apocynaceae      |
| 54 | Odio | <i>Olea dioica</i>               | <i>Olea</i>          | Oleaceae         |
| 55 | Ohai | <i>Olea hainanensis</i>          | <i>Olea</i>          | Oleaceae         |
| 56 | Pann | <i>Pouteria annamensis</i>       | <i>Pouteria</i>      | Sapotaceae       |
| 57 | Ppis | <i>Popowia pisocarpa</i>         | <i>Popowia</i>       | Annonaceae       |
| 58 | Prub | <i>Psychotria rubra</i>          | <i>Psychotria</i>    | Rubiaceae        |
| 59 | Ptav | <i>Phoebe tavoyana</i>           | <i>Phoebe</i>        | Lauraceae        |
| 60 | Ptet | <i>Prismatomeris tetrantra</i>   | <i>Prismatomeris</i> | Rubiaceae        |
| 61 | Rdum | <i>Rhodamnia dumetorum</i>       | <i>Rhodamnia</i>     | Myrtaceae        |
| 62 | Rfro | <i>Radermachera frondosa</i>     | <i>Radermachera</i>  | Bignoniaceae     |
| 63 | Rthy | <i>Reevesia thyrsoidea</i>       | <i>Reevesia</i>      | Sterculiaceae    |
| 64 | Schu | <i>Syzygium chunianum</i>        | <i>Syzygium</i>      | Myrtaceae        |
| 65 | Sgla | <i>Sindora glabra</i>            | <i>Sindora</i>       | Fabaceae         |
| 66 | Sglo | <i>Suregada glomerulata</i>      | <i>Suregada</i>      | Euphorbiaceae    |
| 67 | Shai | <i>Styrax hainanensis</i>        | <i>Styrax</i>        | Styracaceae      |
| 68 | Sili | <i>Streblus ilicifolius</i>      | <i>Taxotrophis</i>   | Moraceae         |
| 69 | Slau | <i>Sarcosperma laurinum</i>      | <i>Sarcosperma</i>   | Sapotaceae       |
| 70 | Smac | <i>Salacia macrophylla</i>       | <i>Salacia</i>       | Celastraceae     |
| 71 | Spoi | <i>Symplocos poilanei</i>        | <i>Symplocos</i>     | Symplocaceae     |
| 72 | Spro | <i>Saccopetalum prolificum</i>   | <i>Saccopetalum</i>  | Annonaceae       |
| 73 | Spse | <i>Symplocos pseudobarberina</i> | <i>Symplocos</i>     | Symplocaceae     |
| 74 | Ssup | <i>Schima superba</i>            | <i>Schima</i>        | Theaceae         |
| 75 | Step | <i>Syzygium tephrodes</i>        | <i>Syzygium</i>      | Myrtaceae        |
| 76 | Tcau | <i>Themeda caudata</i>           | <i>Themeda</i>       | Poaceae          |
| 77 | Twal | <i>Tarennoidea wallichii</i>     | <i>Tarennoidea</i>   | Rubiaceae        |
| 78 | Vman | <i>Vatica mangachapoi</i>        | <i>Vatica</i>        | Dipterocarpaceae |
| 79 | Xhai | <i>Xanthophyllum hainanense</i>  | <i>Xanthophyllum</i> | Xanthophyllaceae |

---

**Table S2. a** Plant composition of families, genera and species in early succession stage.

|    | Family           | Genus | Species | Genus : Species |
|----|------------------|-------|---------|-----------------|
| 1  | Euphorbiaceae    | 5     | 6       | 5:6             |
| 2  | Myrtaceae        | 4     | 5       | 4:5             |
| 3  | Lauraceae        | 2     | 3       | 2:3             |
| 4  | Fabaceae         | 3     | 3       | 1:1             |
| 5  | Guttiferae       | 2     | 2       | 1:1             |
| 6  | Melastomataceae  | 2     | 2       | 1:1             |
| 7  | Rubiaceae        | 2     | 2       | 1:1             |
| 8  | Theaceae         | 2     | 2       | 1:1             |
| 9  | Annonaceae       | 1     | 1       | 1:1             |
| 10 | Apocynaceae      | 1     | 1       | 1:1             |
| 11 | Bignoniaceae     | 1     | 1       | 1:1             |
| 12 | Capparaceae      | 1     | 1       | 1:1             |
| 13 | Dilleniaceae     | 1     | 1       | 1:1             |
| 14 | Dipterocarpaceae | 1     | 1       | 1:1             |
| 15 | Ebenaceae        | 1     | 1       | 1:1             |
| 16 | Flacourtiaceae   | 1     | 1       | 1:1             |
| 17 | Oleaceae         | 1     | 1       | 1:1             |
| 18 | Papilionaceae    | 1     | 1       | 1:1             |
| 19 | Phyllanthaceae   | 1     | 1       | 1:1             |
| 20 | Polygalaceae     | 1     | 1       | 1:1             |
| 21 | Rutaceae         | 1     | 1       | 1:1             |
| 22 | Salicaceae       | 1     | 1       | 1:1             |
| 23 | Sterculiaceae    | 1     | 1       | 1:1             |
| 24 | Thymelaeaceae    | 1     | 1       | 1:1             |
| 25 | Tiliaceae        | 1     | 1       | 1:1             |
| 26 | Verbenaceae      | 1     | 1       | 1:1             |

**Table S2. b** Plant composition of families, genera and species in early-mid succession stage.

|    | Family           | Genus | Species | Genus : Species |
|----|------------------|-------|---------|-----------------|
| 1  | Ebenaceae        | 1     | 3       | 1:3             |
| 2  | Myrtaceae        | 2     | 4       | 1:2             |
| 3  | Moraceae         | 1     | 2       | 1:2             |
| 4  | Fagaceae         | 3     | 5       | 3:5             |
| 5  | Euphorbiaceae    | 6     | 9       | 2:3             |
| 6  | Lauraceae        | 5     | 7       | 5:7             |
| 7  | Sterculiaceae    | 3     | 4       | 3:4             |
| 8  | Rubiaceae        | 5     | 5       | 1:1             |
| 9  | Annonaceae       | 2     | 2       | 1:1             |
| 10 | Dipterocarpaceae | 2     | 2       | 1:1             |
| 11 | Fabaceae         | 2     | 2       | 1:1             |
| 12 | Flacourtiaceae   | 2     | 2       | 1:1             |
| 13 | Sapindaceae      | 2     | 2       | 1:1             |
| 14 | Theaceae         | 2     | 2       | 1:1             |
| 15 | Bignoniaceae     | 1     | 1       | 1:1             |
| 16 | Capparaceae      | 1     | 1       | 1:1             |
| 17 | Connaraceae      | 1     | 1       | 1:1             |
| 18 | Dilleniaceae     | 1     | 1       | 1:1             |
| 19 | Guttiferae       | 1     | 1       | 1:1             |
| 20 | Icacinaceae      | 1     | 1       | 1:1             |
| 21 | Juglandaceae     | 1     | 1       | 1:1             |
| 22 | Magnoliaceae     | 1     | 1       | 1:1             |
| 23 | Melastomataceae  | 1     | 1       | 1:1             |
| 24 | Meliaceae        | 1     | 1       | 1:1             |
| 25 | Menispermaceae   | 1     | 1       | 1:1             |
| 26 | Myrsinaceae      | 1     | 1       | 1:1             |
| 27 | Oleaceae         | 1     | 1       | 1:1             |
| 28 | Phyllanthaceae   | 1     | 1       | 1:1             |
| 29 | Poaceae          | 1     | 1       | 1:1             |
| 30 | Rosaceae         | 1     | 1       | 1:1             |
| 31 | Rutaceae         | 1     | 1       | 1:1             |
| 32 | Santalaceae      | 1     | 1       | 1:1             |
| 33 | Sapotaceae       | 1     | 1       | 1:1             |
| 34 | Staphyleaceae    | 1     | 1       | 1:1             |
| 35 | Styracaceae      | 1     | 1       | 1:1             |
| 36 | Symplocaceae     | 1     | 1       | 1:1             |
| 37 | Tiliaceae        | 1     | 1       | 1:1             |
| 38 | Verbenaceae      | 1     | 1       | 1:1             |
| 39 | Xanthophyllaceae | 1     | 1       | 1:1             |



**Table S2. c** Plant composition of families, genera and species in mid succession stage.

|    | Family           | Genus | Species | Genus : Species |
|----|------------------|-------|---------|-----------------|
| 1  | Ebenaceae        | 1     | 3       | 1:3             |
| 2  | Myrsinaceae      | 1     | 3       | 1:3             |
| 3  | Oleaceae         | 1     | 2       | 1:2             |
| 4  | Symplocaceae     | 1     | 2       | 1:2             |
| 5  | Moraceae         | 2     | 3       | 2:3             |
| 6  | Sterculiaceae    | 2     | 3       | 2:3             |
| 7  | Theaceae         | 2     | 3       | 2:3             |
| 8  | Fagaceae         | 3     | 4       | 3:4             |
| 9  | Myrtaceae        | 3     | 4       | 3:4             |
| 10 | Lauraceae        | 7     | 8       | 7:8             |
| 11 | Euphorbiaceae    | 6     | 6       | 1:1             |
| 12 | Rubiaceae        | 5     | 5       | 1:1             |
| 13 | Annonaceae       | 4     | 4       | 1:1             |
| 14 | Dipterocarpaceae | 2     | 2       | 1:1             |
| 15 | Fabaceae         | 2     | 2       | 1:1             |
| 16 | Sapindaceae      | 2     | 2       | 1:1             |
| 17 | Sapotaceae       | 2     | 2       | 1:1             |
| 18 | Apocynaceae      | 1     | 1       | 1:1             |
| 19 | Aquifoliaceae    | 1     | 1       | 1:1             |
| 20 | Bignoniaceae     | 1     | 1       | 1:1             |
| 21 | Burseraceae      | 1     | 1       | 1:1             |
| 22 | Capparaceae      | 1     | 1       | 1:1             |
| 23 | Celastraceae     | 1     | 1       | 1:1             |
| 24 | Connaraceae      | 1     | 1       | 1:1             |
| 25 | Dilleniaceae     | 1     | 1       | 1:1             |
| 26 | Flacourtiaceae   | 1     | 1       | 1:1             |
| 27 | Guttiferae       | 1     | 1       | 1:1             |
| 28 | Icacinaceae      | 1     | 1       | 1:1             |
| 29 | Juglandaceae     | 1     | 1       | 1:1             |
| 30 | Melastomataceae  | 1     | 1       | 1:1             |
| 31 | Meliaceae        | 1     | 1       | 1:1             |
| 32 | Poaceae          | 1     | 1       | 1:1             |
| 33 | Rosaceae         | 1     | 1       | 1:1             |
| 34 | Rutaceae         | 1     | 1       | 1:1             |
| 35 | Styracaceae      | 1     | 1       | 1:1             |
| 36 | Thymelaeaceae    | 1     | 1       | 1:1             |
| 37 | Verbenaceae      | 1     | 1       | 1:1             |
| 38 | Xanthophyllaceae | 1     | 1       | 1:1             |

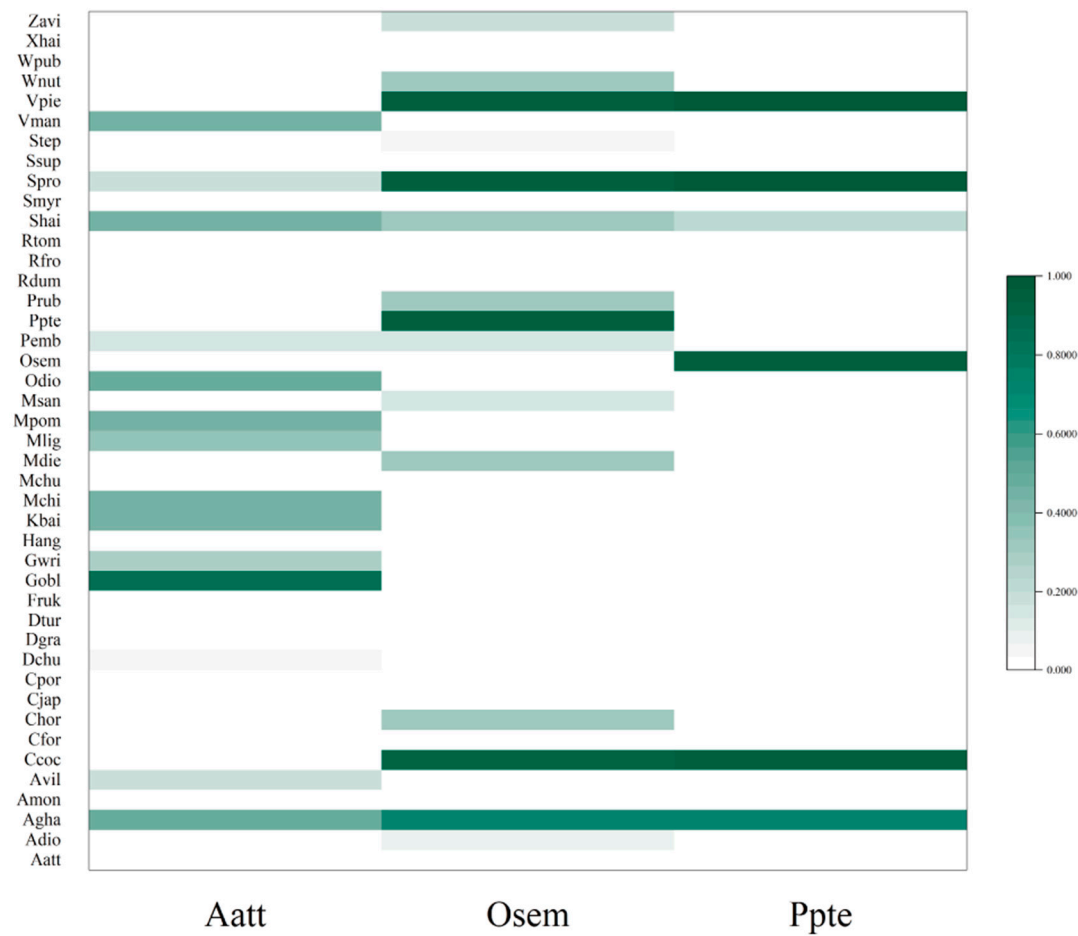

**Figure S1. a.** Niche overlap of leguminous trees in early successional stages. See TableS1.a for the comparison of plant name abbreviations.

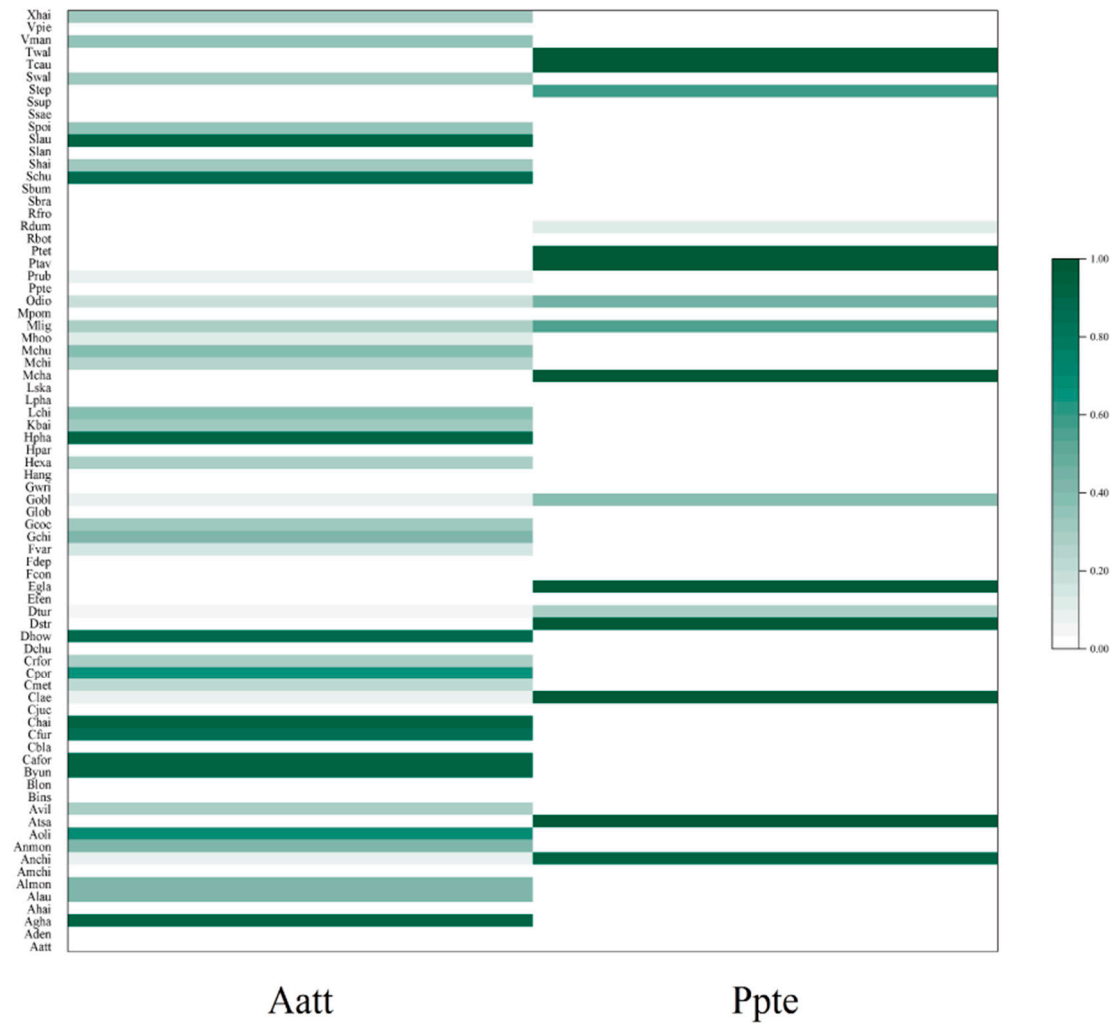

**Figure S1. b.** Niche overlap of leguminous trees in early-mid successional stages. See TableS1.b for the comparison of plant name abbreviations.

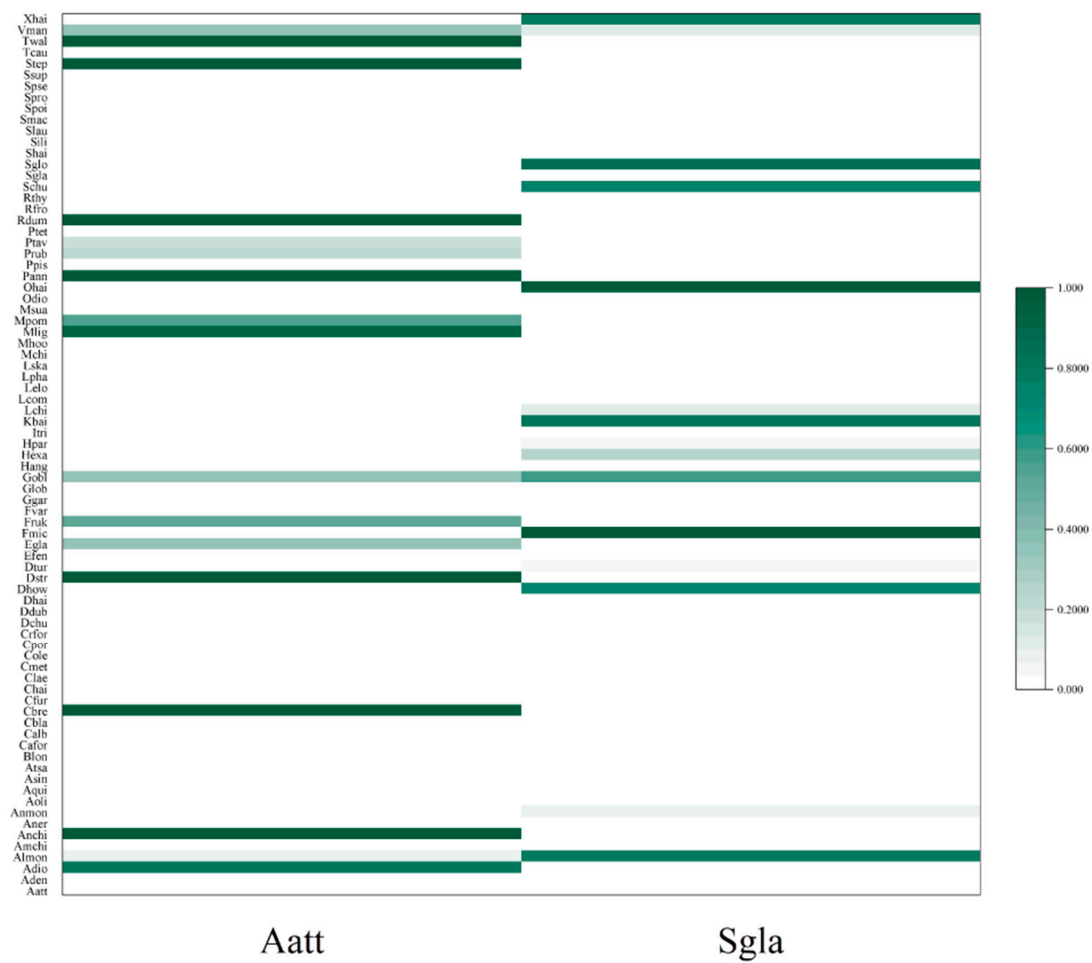

**Figure S1. c.** Niche overlap of leguminous trees in mid successional stages. See TableS1.c for the comparison of plant name abbreviations.

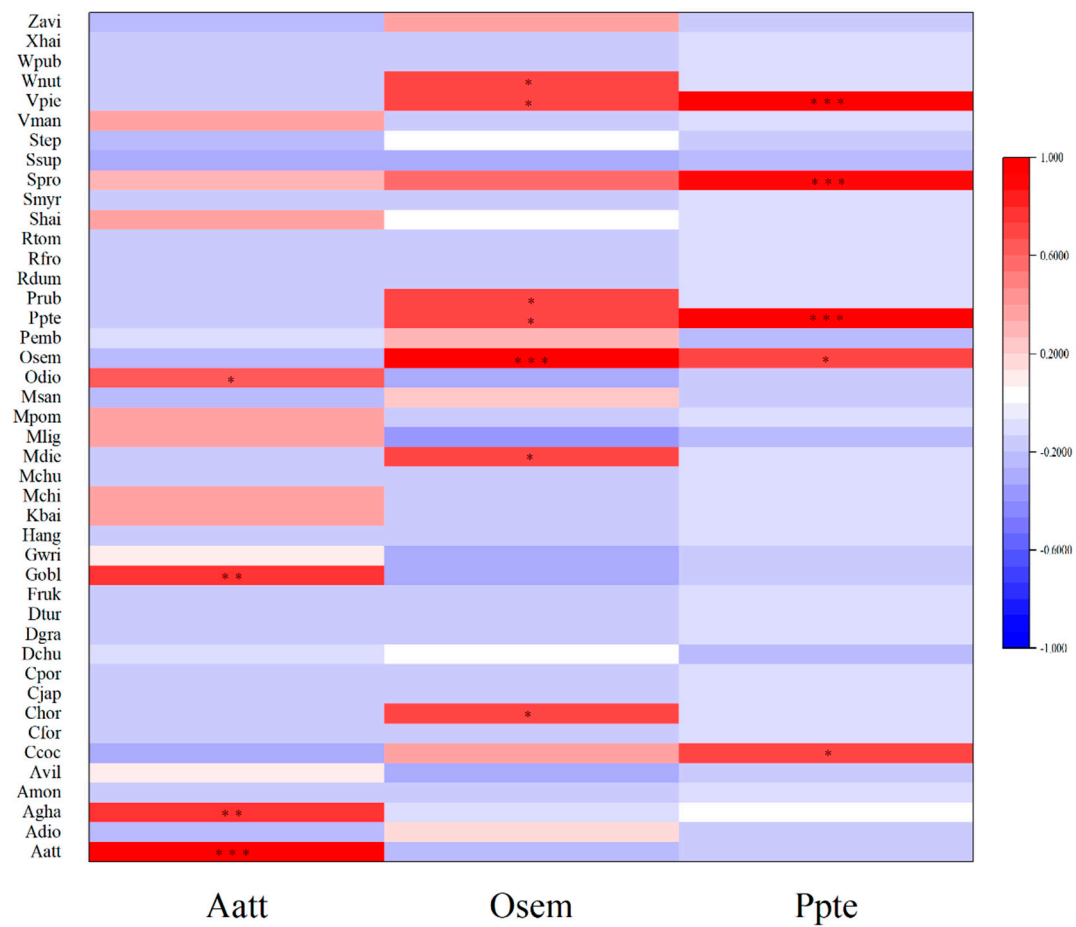

**Figure S2. a.** Pearson's significance and correlation coefficients of leguminous trees in early successional stages. See TableS1.a for the comparison of plant name abbreviations.

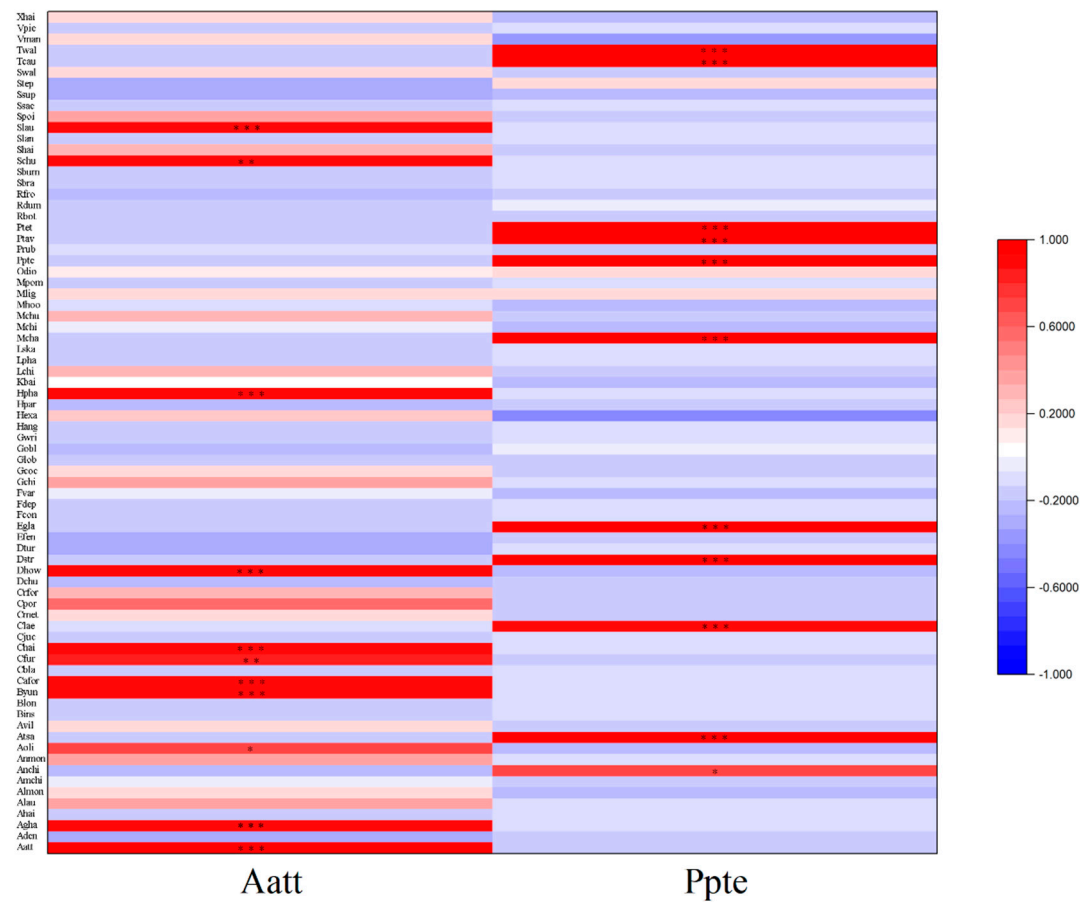

**Figure S2. b.** Pearson's significance and correlation coefficients of leguminous trees in early-mid successional stages. See TableS1.b for the comparison of plant name abbreviations.

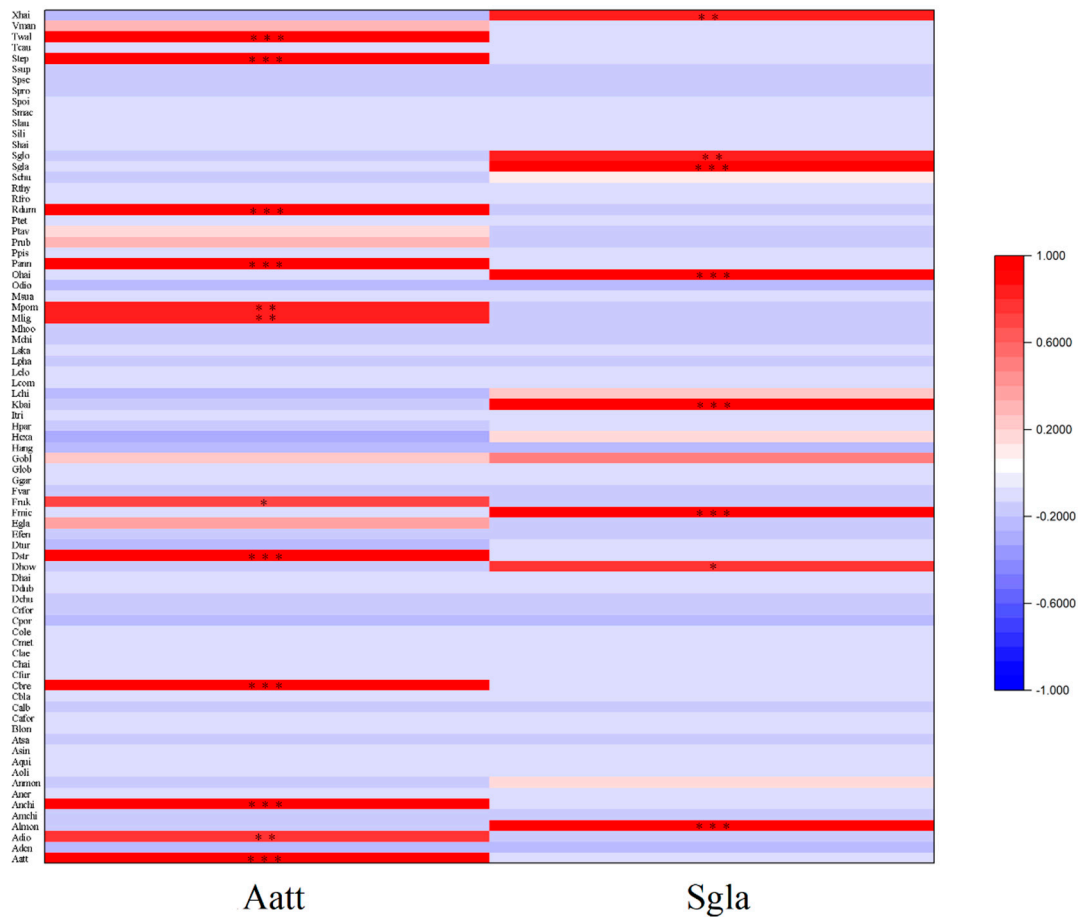

**Figure S2. c.** Pearson's significance and correlation coefficients of leguminous trees in mid successional stages. See TableS1.c for the comparison of plant name abbreviations.
